# Supplementary material for: Lung epithelium and myeloid cells cooperate to clear acute pneumococcal infection
Source: PubMed Central journal article supplement — Mucosal Immunol. 2015 Dec 2;9(5):1288–302. doi: 10.1038/mi.2015.128 (PMC4990776; doi:10.1038/mi.2015.128), 2015-12-02

# Supplementary Fig S1.

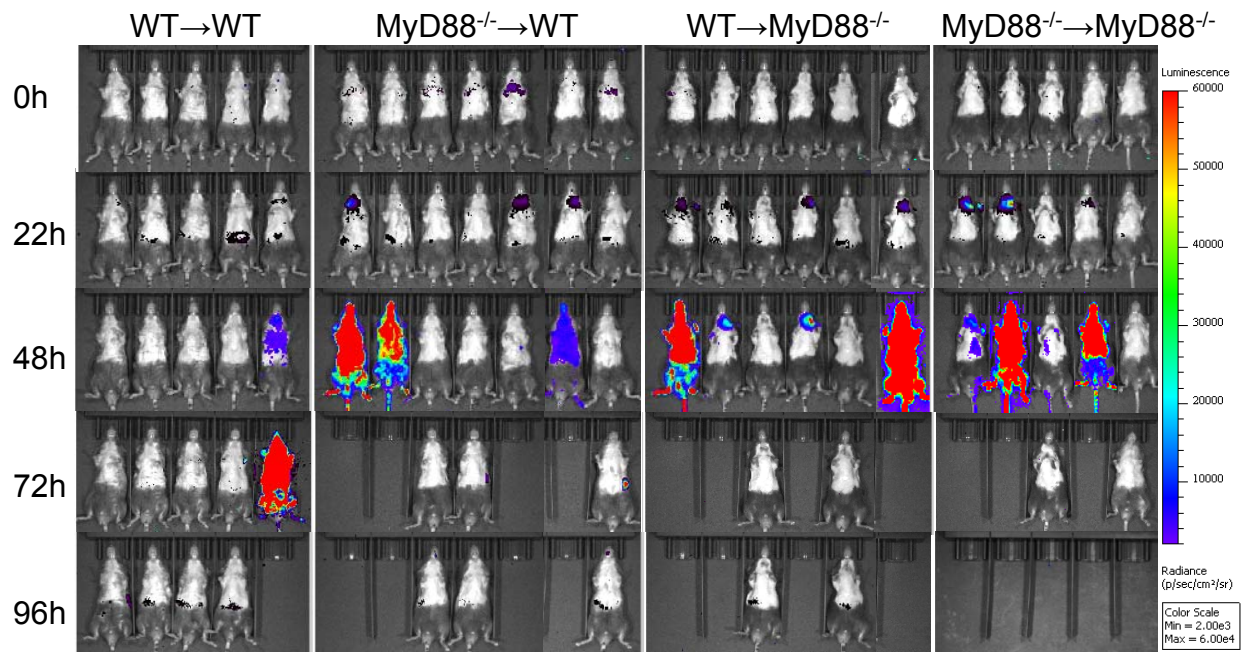

# Supplementary Fig S2.

a

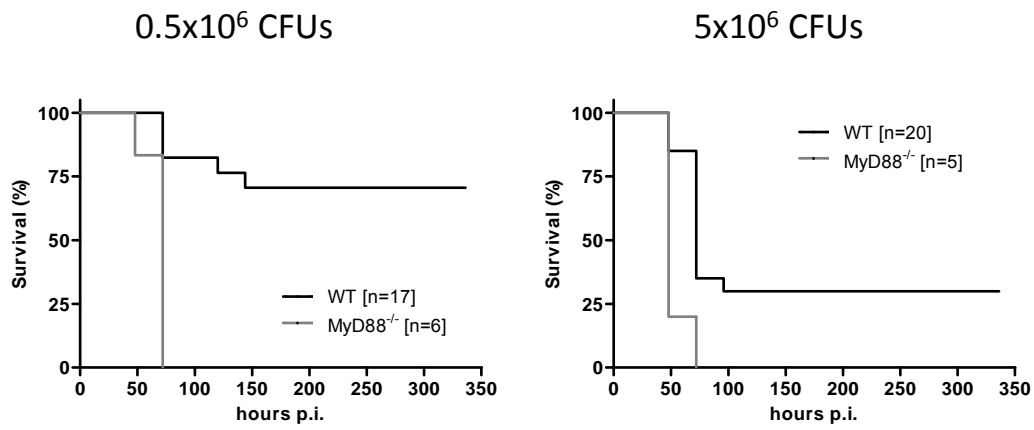

b

Low dose (0.2x10<sup>6</sup> CFUs) infection 18h p.i.

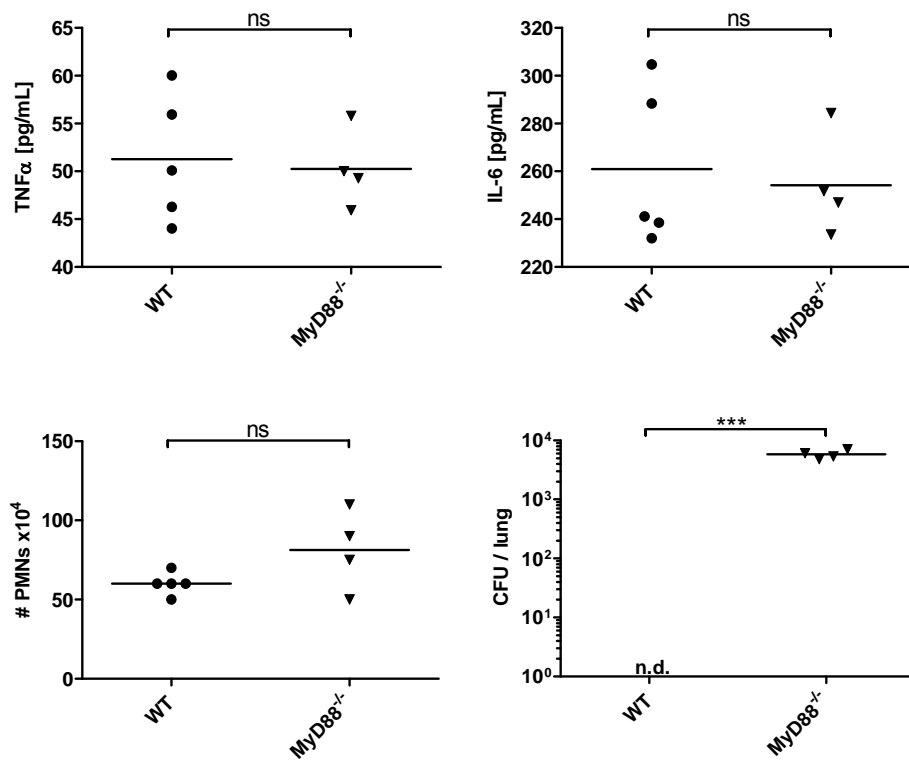

# Supplementary Fig S3.

**a**

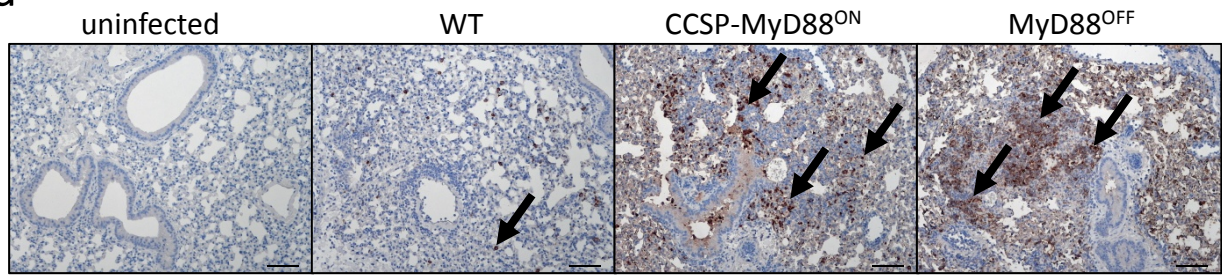

**b**

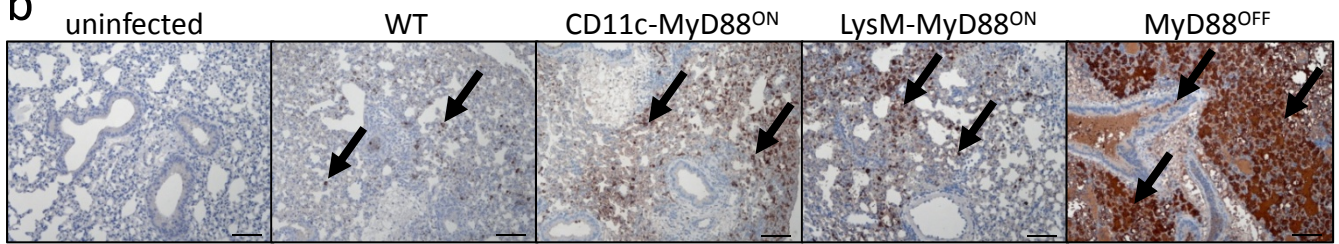

# Supplementary Fig S4.

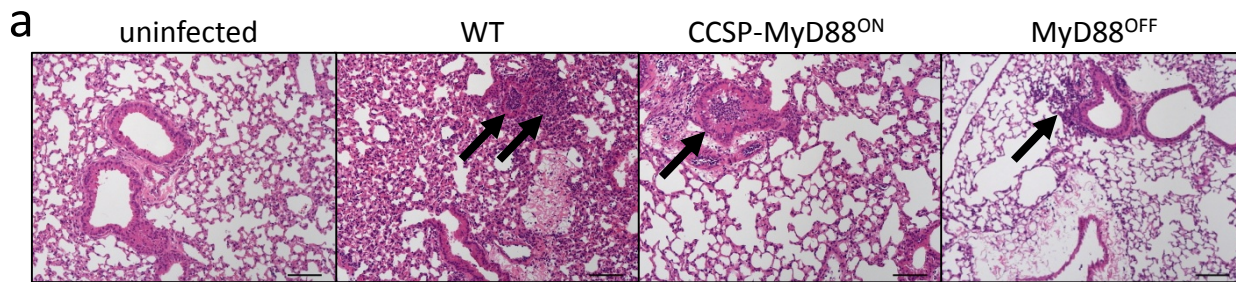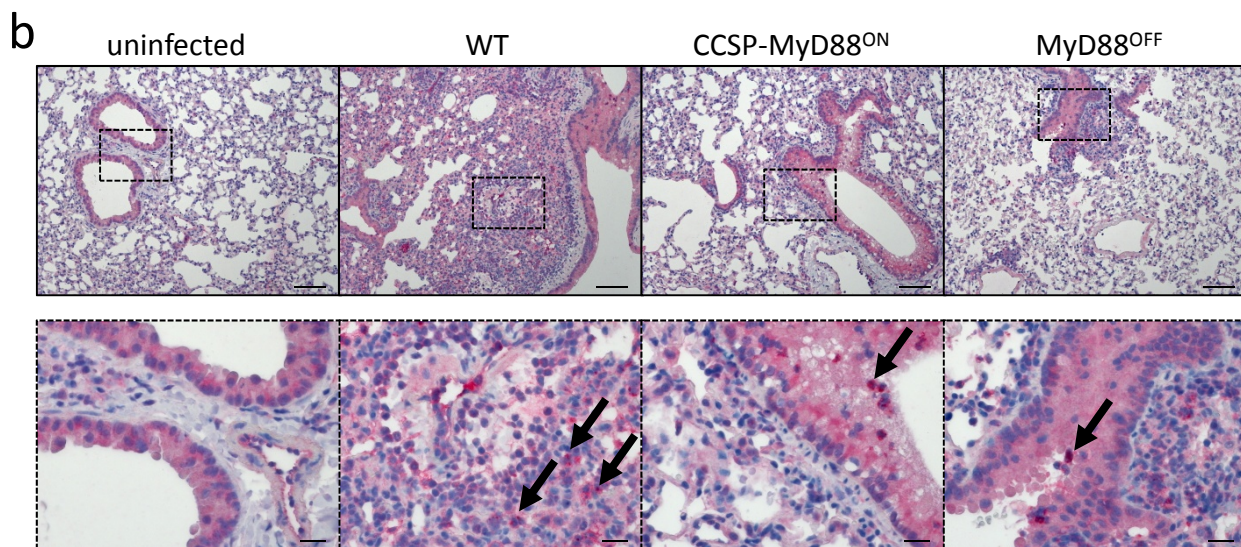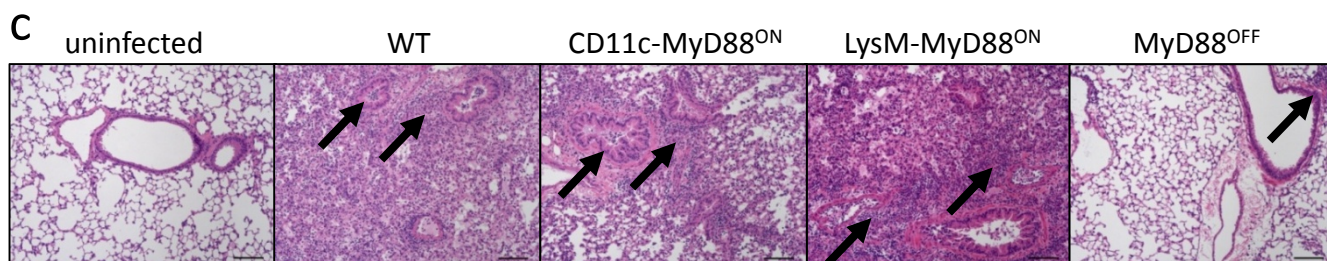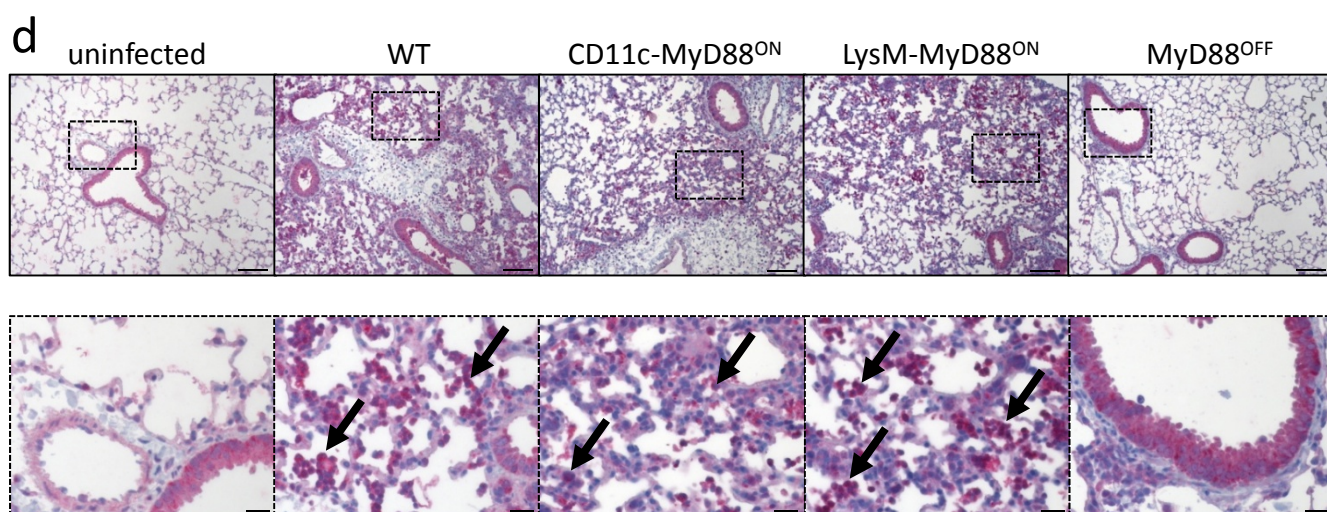

# Supplementary Fig S5.

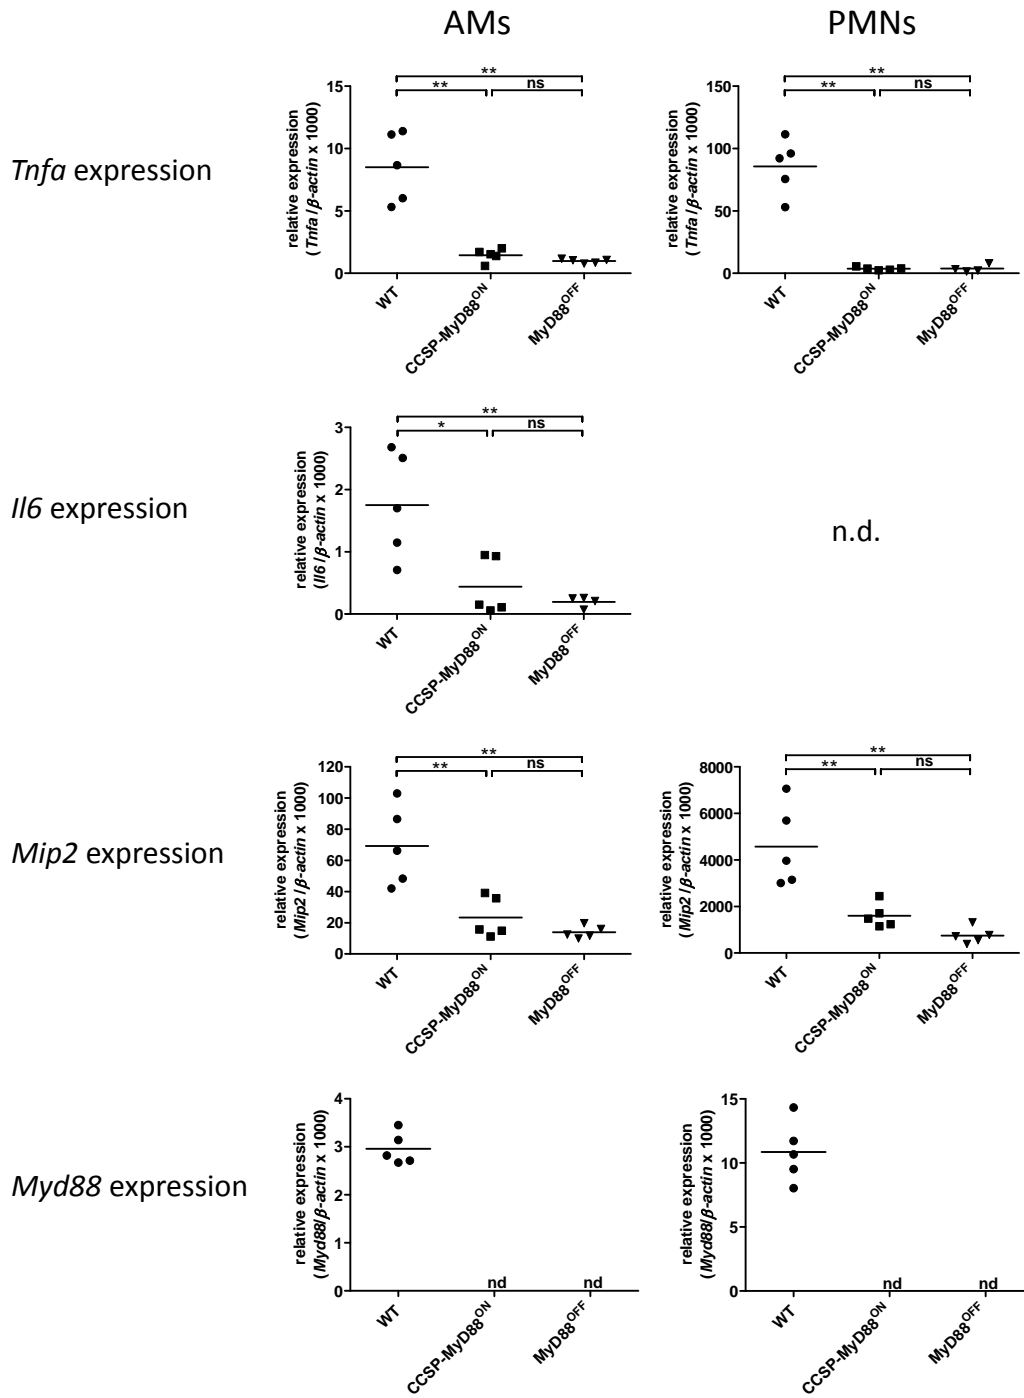

# Supplementary Fig S6.

a

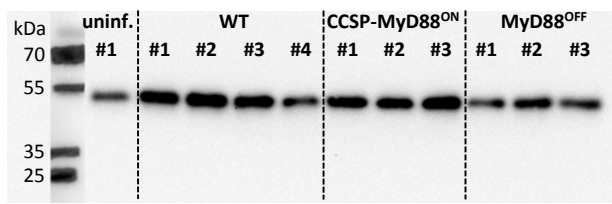

b

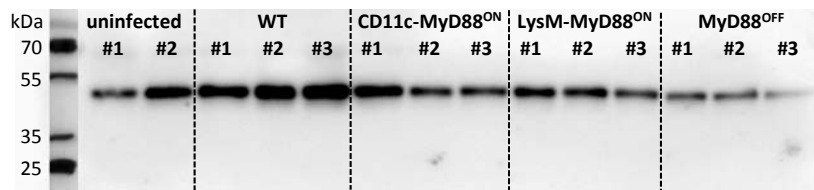

# Supplementary Fig S7.

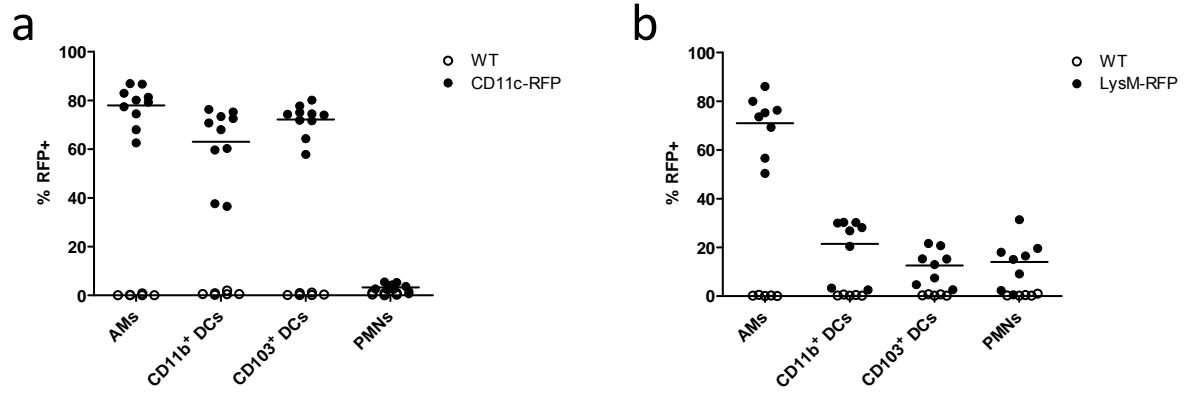

**C**

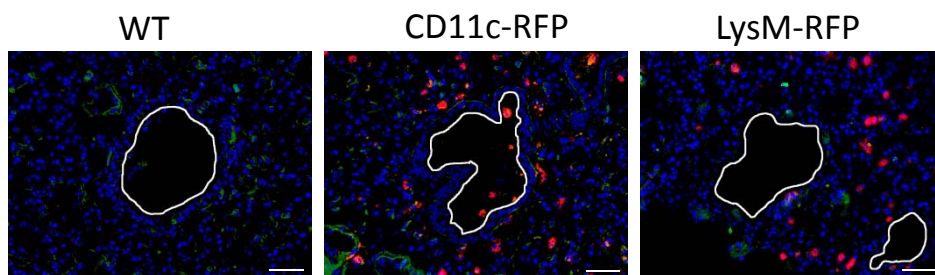

# Supplementary Fig S8.

a

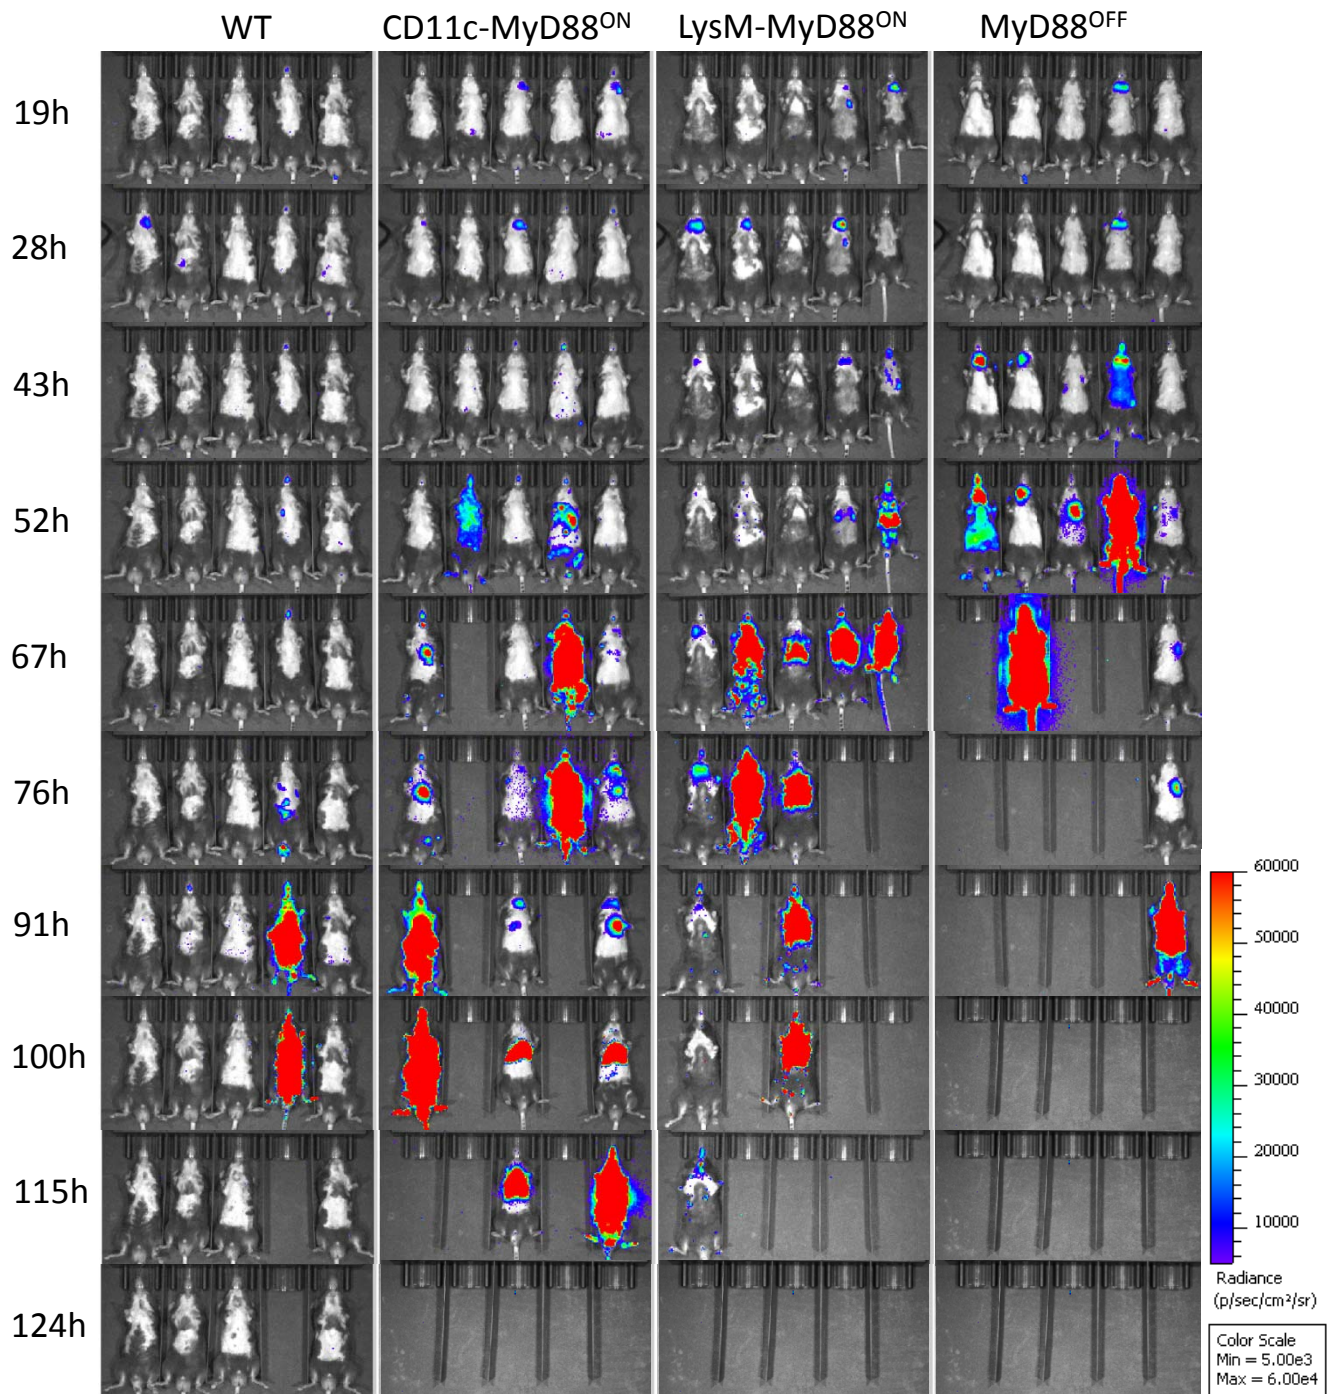

b

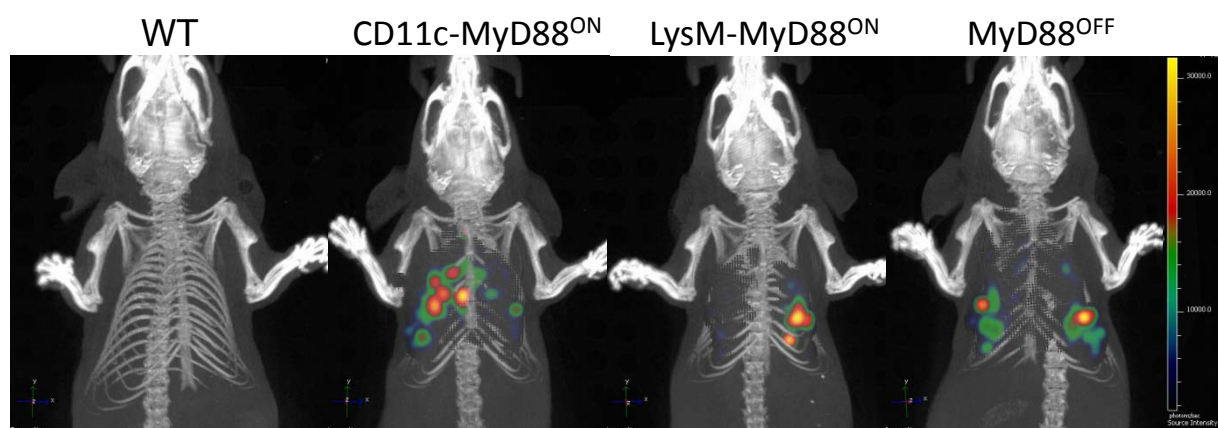



# Supplementary Fig S9.

a

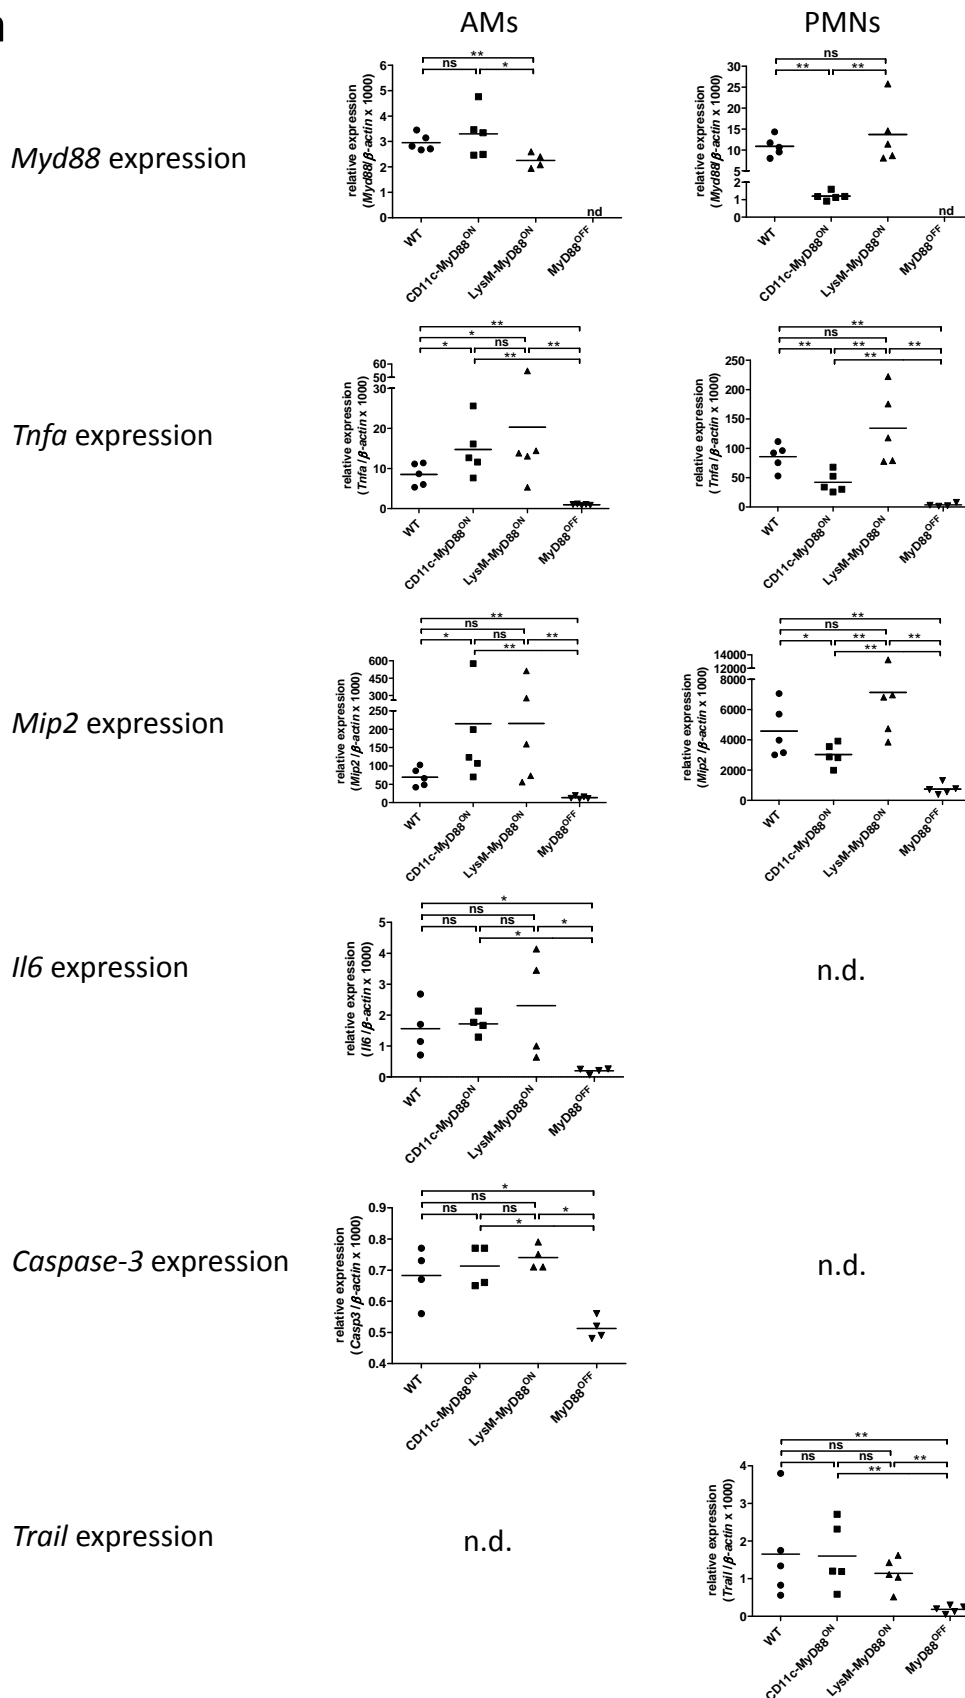

b

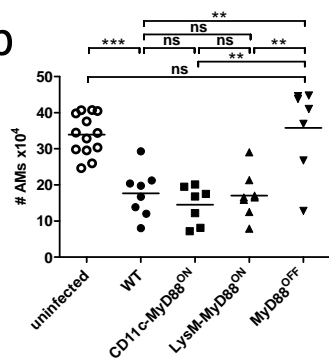

# Supplementary Fig S10.

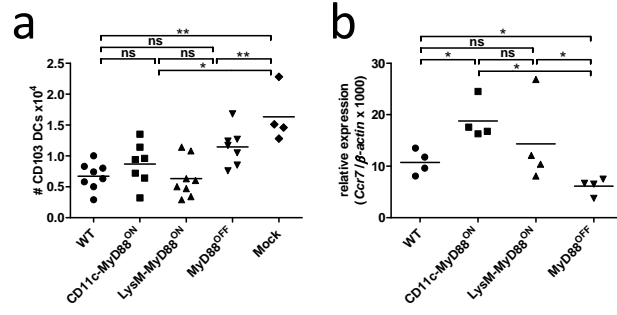

Supplement: mi2015128x1.pdf [file mi2015128x1.pdf]
